# Supplementary material for: Abscisic acid is a substrate of the ABC transporter encoded by the durable wheat disease resistance gene Lr34
Source: PubMed Central journal article supplement (PMC6618152; doi:10.1111/nph.15815), 2019-04-22
Supplement: NPH-223-853-s001.pdf [file NPH-223-853-s001.pdf]

***New Phytologist* Supporting Information**

**Abscisic acid is a substrate of the ABC transporter encoded by the durable wheat disease resistance gene *Lr34***

**Simon G. Krattinger, Joohyun Kang, Stephanie Bräunlich, Rainer Boni, Harsh Chauhan, Liselotte L. Selter, Mark D. Robinson, Marc W. Schmid, Elena Wiederhold, Goetz Hensel, Jochen Kumlehn, Justine Sucher, Enrico Martinoia, Beat Keller**

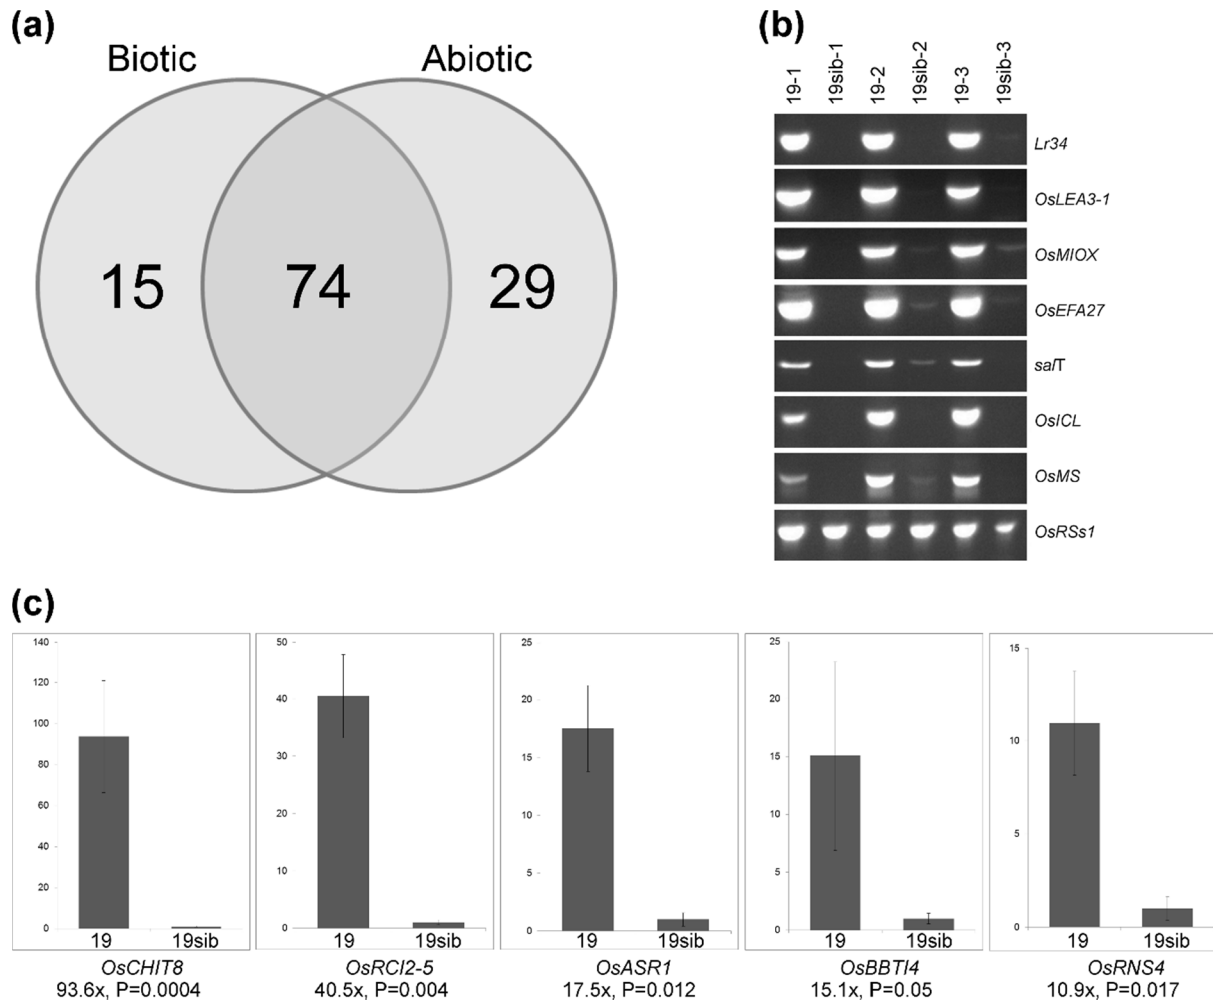

**Fig. S1** *Lr34res* induces a multiple stress response in rice. **(a)** Venn diagram showing number of genes of the '*Lr34res*-responsive core gene set' that were found to be differentially expressed by biotic and/or abiotic stress in a rice meta-analysis (Shaik & Ramakrishna, 2014). **(b)** Semi quantitative RT-PCR of known stress-responsive genes. Most of these genes are not or only very weakly expressed in the sib line in a stress-free environment but they are strongly induced in the *Lr34res*-containing rice line 19. 19sib-1, 19sib-2 and 19sib-3 represent three independent biological replicates of 19sib whereas 19-1, 19-2 and 19-3 are three independent biological replicates of line 19. *OsLEA3-1* = late embryogenesis abundant 3-1; *OsMIOX* = *myo*-inositol oxygenase; *OsEFA27* = caleosin; *saIT* = salt stress-induced; *OsICL* = isocitrate lyase; *OsMS*; malate synthase; *OsRSs1* = sucrose synthase-1 (reference gene) (Wang *et al.*, 1992). **(c)** Quantitative RT-PCR expression analysis of the stress-responsive genes *OsCHIT8*, *OsRCI2-5*, *OsASR1*, *OsBBT14* and *OsRNS4*. RT-qPCRs were done on plants of the *Lr34res*-expressing rice line 19 and its sib 19sib. Relative fold changes (19sib was set to 1) and P-values (Student's t-test on  $\log_{10}$  transformed expression values) are indicated. Three biological replicates were used, mean  $\pm$  SEM. Details on the function of the genes used in **(b)** and **(c)** are given in Table S3.

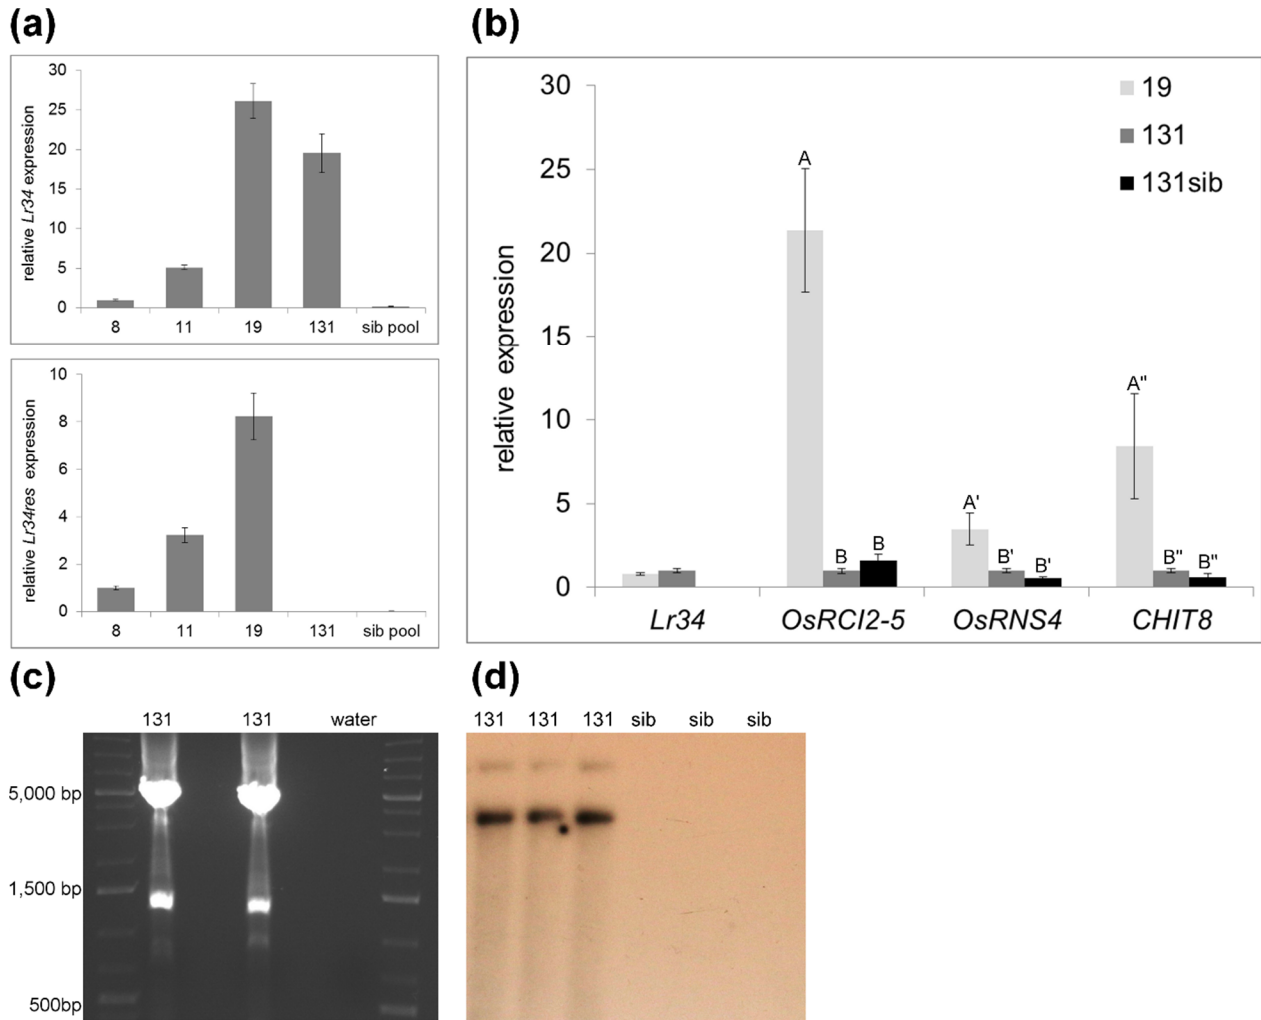

**Fig. S2 Characterization of the *Lr34sus* rice line 131.** (a) *Lr34* expression levels in coleoptiles of *Lr34res* lines 8, 11 and 19 compared to the *Lr34sus* line 131. RNA was extracted from at least 10 pooled coleoptiles.  $n = 3$  technical replicates, mean  $\pm$  SEM. A primer pair amplifying both *Lr34* alleles was used in the upper panel and a *Lr34res*-specific primer pair was used in the lower panel. (b) RT-qPCR for *Lr34* and the *Lr34res*-responsive genes *OsRCI2-5*, *OsRNS4* and *CHIT8* on four-week-old rice seedlings of lines 19, 131 and 131sib.  $n = 4$  biological replicates, mean  $\pm$  SEM, letters indicate lines with similar expression levels ( $P > 0.05$ ; Tukey's honest significance test). These genes were chosen because they have a known function in stress tolerance (see Table S3) (c) Full-length cDNA amplification of the *Lr34sus* allele in line 131. The expected fragment size was 4,321bp. The integrity of the *Lr34sus* full-length cDNA was verified by sequencing. (d) Southern blot showing copy number in line 131. A probe for the selectable marker gene *HPT* was used (Risk *et al.*, 2013).

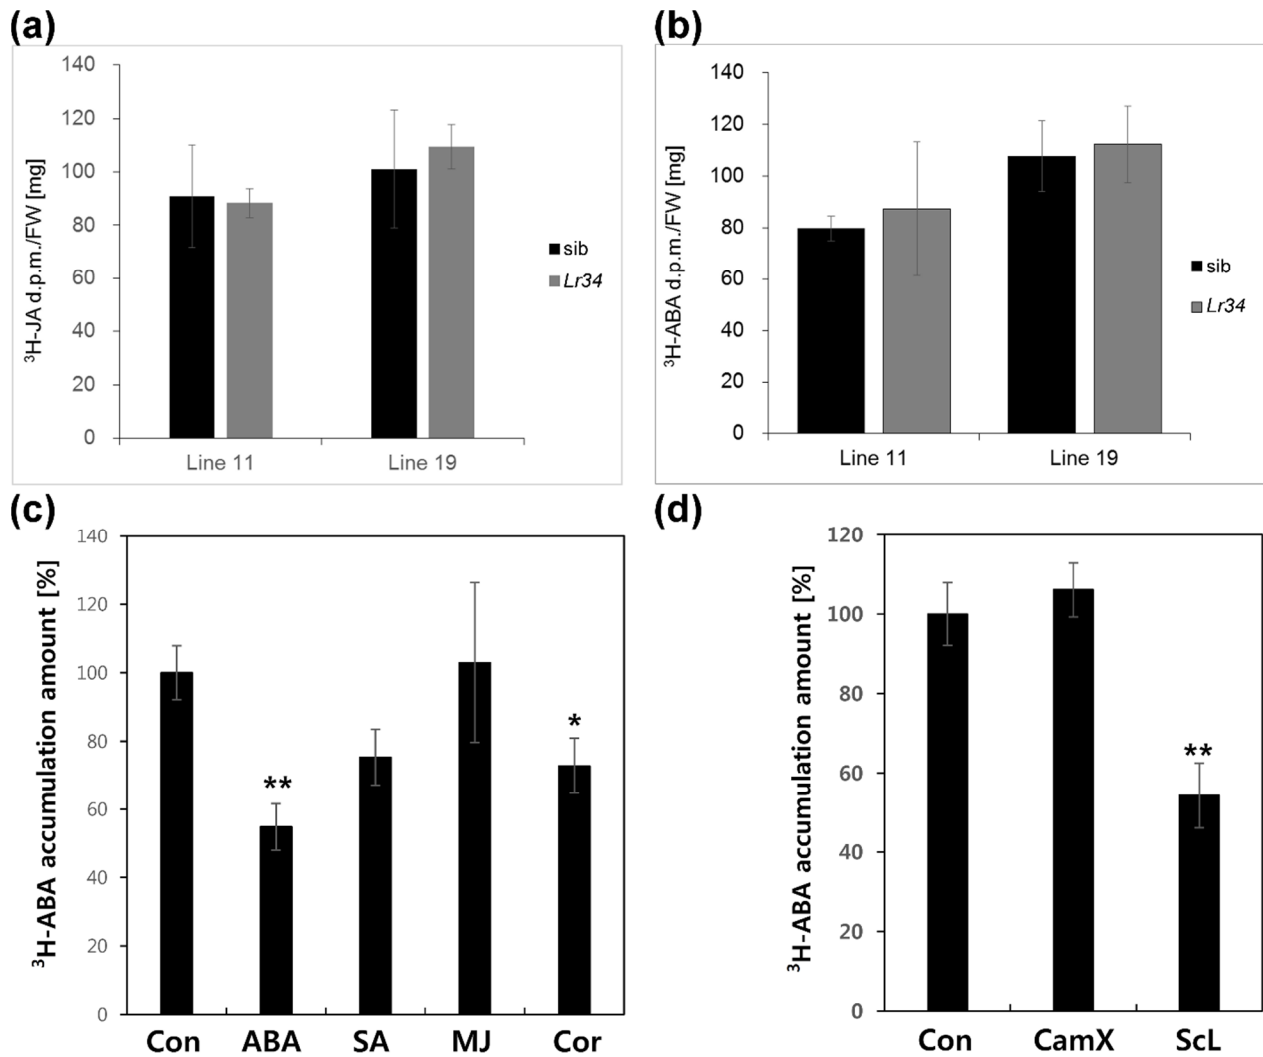

**Fig. S3 LR34 changes ABA fluxes.** (a)  $^3\text{H-JA}$  accumulation (disintegrations per minute, d.p.m.) in rice seedlings of lines 11 and 19 compared to respective sib lines.  $N = 3$ ,  $n = 6-17$ , mean  $\pm$  SEM. (b)  $^3\text{H-ABA}$  accumulation in non-germinated caryopses of rice lines 11 and 19 compared to sib lines.  $N = 3$ ,  $n = 3-17$ , mean  $\pm$  SEM. (c) Relative  $^3\text{H-ABA}$  accumulation in yeast strain YMM12 after addition of cold phytohormones or hormone analogs [ $3 \mu\text{M}$ ] salicylic acid (SA), methyl jasmonate (MJ), coronatine (Cor). The control (Con) without inhibitor was set to 100%, mean  $\pm$  SEM. \*  $P < 0.05$ , \*\*  $P < 0.01$ . (d) Relative  $^3\text{H-ABA}$  accumulation in yeast strain YMM12 after addition of the indole alkaloid camalexin (CamX) and the diterpene sclareol (ScL) [ $3 \mu\text{M}$ ]. Both components have been reported to contribute to disease resistance in Arabidopsis. The control (Con) without competitor was set to 100%, mean  $\pm$  SEM. \*  $P < 0.05$ , \*\*  $P < 0.01$ .

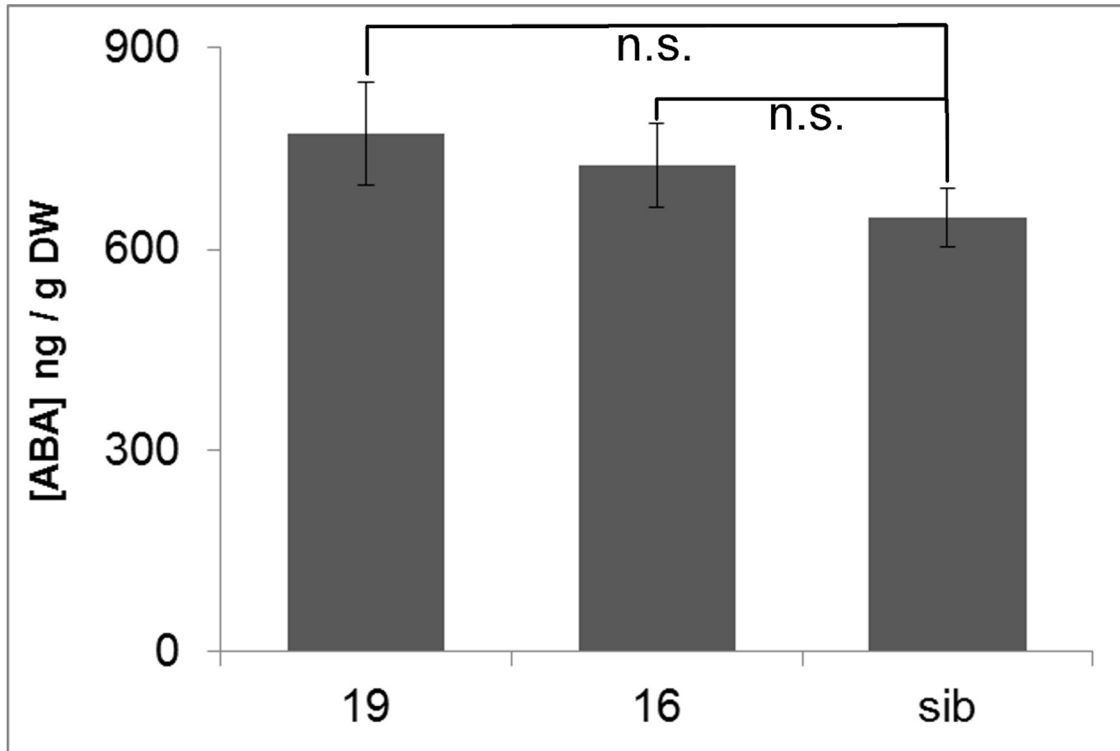

**Fig. S4** ABA concentrations in whole leaves of three-week-old plants of *Lr34res*-containing lines 19 and 16 compared to sib lines.  $n = 3$  biological replicates, mean  $\pm$  SEM, n.s. = non-significant difference (Student's t-test,  $P < 0.05$ ).

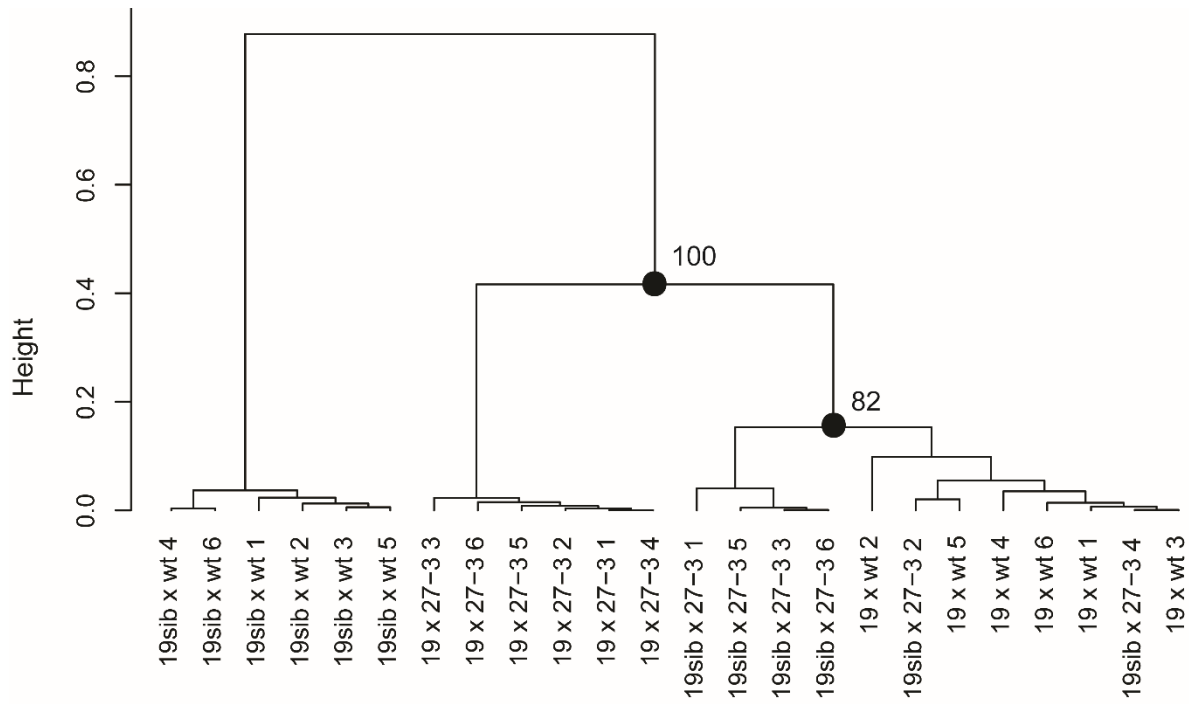

**Fig. S5** Cluster analysis of the leaf sheath infection assay shown in Fig. 5c. Numbers at the edges indicate the Approximately Unbiased (AU) p-values.

**Table S1.** Primer sequences used in this study

| semi RT-qPCR                 |                       |                         |                        |             |              |  |
|------------------------------|-----------------------|-------------------------|------------------------|-------------|--------------|--|
| gene name                    | forward primer        | reverse primer          | fragment size [bp]     | Tm [°C]     | cycle number |  |
| <i>OsLEA3-1</i>              | GACCTCCAGCAGCTCGCAGG  | GTGGCAGAGGTGCTCTGTTG    | 327                    | 60          | 35           |  |
| <i>OsMIOX</i>                | GCCATGACGACTACATGTACC | CGATGAGTGACATGTAGTAGG   | 249                    | 60          | 35           |  |
| <i>OsEFA27</i>               | GGTCTAAGCTACCCAACTCTG | CACGTAGAGCAATATCCACTC   | 282                    | 60          | 30           |  |
| <i>sai1</i>                  | GACCGTGGTGAAGATTGGTC  | CCAGTTTAATCTCTGTAGAGGTC | 206                    | 65          | 40           |  |
| <i>OsICL</i>                 | GTGTGGCAGTTTACACGCTC  | CATGAGCCCTTGAACCTGCTC   | 266                    | 62          | 35           |  |
| <i>OsMS</i>                  | GACCGCACCGTCGAGATCAC  | GTGATCGTGCCGGCAACCGC    | 173                    | 65          | 40           |  |
| <i>Lr34_full_length cDNA</i> | GAGTACGGCTAGGCAATAGC  | GGCAAGTAGCTATATCTGTAAC  | 4,321 (sus) 4,318(res) | Touch down* |              |  |

  

| RT-qPCR                           |                        |                         |                    |                   |                  |  |
|-----------------------------------|------------------------|-------------------------|--------------------|-------------------|------------------|--|
| gene name                         | forward primer         | reverse primer          | fragment size [bp] | primer efficiency | reference        |  |
| <i>Lr34sus and Lr34res rice</i>   | GACAGCGCCAGAATGGTGC    | GACATCAACCTGTCAATTC     | 179                | 105%              | this study       |  |
| <i>Lr34sus and Lr34res barley</i> | ACTGGATTGCTGTGATGGATA  | ACTGGCAGAAGAACCTTGAAGAA | 80                 | 101.70%           | this study       |  |
| <i>HvGAPDH</i>                    | COGGGTTCCCACTGTGGAT    | TGACTAGCAACTCGGTGCGGG   | 451                | 102%              | this study       |  |
| <i>OsASR1</i>                     | GAGCATACGCCATGCAAGAG   | GATCTCCTCTCACCCCTGTG    | 80                 | 105.7%            | this study       |  |
| <i>OsRC12-5</i>                   | TACGGCTGGGATTGAGTTCTGG | CCGACGCTGGCTCTGCTC      | 125                | 95.7%             | Li et al. (2014) |  |
| <i>OsRNS4</i>                     | CTCATCTCATGTGGCCTGG    | GTTGACCTGACAAAGAGCTG    | 147                | 95.1%             | this study       |  |
| <i>RC24/CHIT8</i>                 | GTGATGACAGGGCAGTGGAC   | CTCTGGTTGATGAGTCCAAG    | 209                | 114%              | this study       |  |
| <i>BBT14</i>                      | GTGACAGCATCGTGCAAGCTG  | GCGGCCACTGTTTACACCTC    | 277                | 100.80%           | this study       |  |

  

| cloning of HA-Lr34        |                                                      |                                                     |                    |         |              |  |
|---------------------------|------------------------------------------------------|-----------------------------------------------------|--------------------|---------|--------------|--|
|                           | forward primer                                       | reverse primer                                      | fragment size [bp] | Tm [°C] | cycle number |  |
| <i>Lr34_fragment1</i>     | CCAAATATCTCTGCAAAACTG                                | CAGCATAACTGGAACTGTATGGATACATCTCAAGATGGGTGAGTTAAATCG | 2,815              | 55      | 35           |  |
| <i>Lr34_fragment2</i>     | ATGTATCCATACGATGTTCCAGATTATGCTGAGGGCCCTCGCAAGAGAGAC  | GGCATATGAACCCACACTCTCAA                             | 4,691              | 55      | 35           |  |
| <i>Lr34_fragment3</i>     | TTGAGGAGTGTGGTTCATATGCC                              | TTGACTGCACGAATAACAATGGCTG                           | 2,987              | 55      | 35           |  |
| <i>Lr34_fragment4</i>     | GCAGCAATTGTTATTGTCAGTC                               | TTGACTGCACGAATAACAATGGCTG                           | 2,754              | 55      | 35           |  |
| <i>Lr34_fragment5</i>     | CACCATAGGCGTTATAATGATCAGAC                           | ATGCAAGCTGATCCACTAG                                 | 3,314              | 55      | 35           |  |
| <i>yeast Leu cassette</i> | CTCCACGAAAATATCCGAACCGCAGCAAGATTGGGTCCTTTTCATCACGTGC | TGCCAGGCAAGCCGAGATGCACCGCGTCCGGCCGCCACCCGCGGT       | 3,792              | 60      | 40           |  |

\*Touch-down PCR (1. 98°C 3min, 2. 98°C 10sec, 3. 67°C 20sec, 72° 2min 50sec, 4. go 10x to 2. while reducing annealing temperature 1°C per cycle, 5. 95°C 10sec; 6. 55°C 20sec, 7. 72°C 2min 50sec, go 25x to 5, 8. 72° 5min)

**Table S3.** *Lr34res*-responsive core genes with a reported function in abiotic or biotic stress tolerance.

| Locus ID       | Gene name         | Gene description                                     | Log <sub>2</sub> FC <sup>1)</sup> | Reported function                                                                        | Reference                 |
|----------------|-------------------|------------------------------------------------------|-----------------------------------|------------------------------------------------------------------------------------------|---------------------------|
| LOC_Os05g46480 | <i>OsLEA3-1</i>   | late embryo-genesis abundant protein                 | 11.9                              | Improved drought tolerance in transgenic rice                                            | (Xiao et al., 2007)       |
| LOC_Os06g36560 | <i>OsMIOX</i>     | <i>myo</i> -inositol oxygenase                       | 3.4                               | Improved drought tolerance in transgenic rice                                            | (Duan et al., 2012)       |
| LOC_Os03g17790 | <i>OsRCI2-5</i>   | putative low temperature and salt responsive protein | 4.1                               | Improved drought tolerance in transgenic rice                                            | (Li et al., 2014)         |
| LOC_Os09g36680 | <i>OsRNS4</i>     | S-like ribonuclease                                  | 3.6                               | Improved salinity tolerance in transgenic rice                                           | (Zheng et al., 2014)      |
| LOC_Os04g43200 | <i>OsEFA27</i>    | caleosin                                             | 8.1                               | Responsive to osmotic stress                                                             | (Frandsen et al., 1996)   |
| LOC_Os07g34520 | <i>OsICL</i>      | isocitrate lyase                                     | 12.2                              | Increased expression after dehydration                                                   | (Maruyama et al., 2014)   |
| LOC_Os04g40990 | <i>OsMS</i>       | malate synthase                                      | 6.5                               | Increased expression after dehydration                                                   | (Maruyama et al., 2014)   |
| LOC_Os01g24710 | <i>saIT</i>       | jacalin-like lectin domain containing protein        | 7.0                               | Responsive to drought stress                                                             | (Claes et al., 1990)      |
| LOC_Os01g72900 | <i>OsASR1</i>     | ABA-, stress- and ripening-induced                   | 2.5                               | Increased expression after drought stress                                                | (Perez-Diaz et al., 2014) |
| LOC_Os06g51060 | <i>RC24/CHIT8</i> | chitinase                                            | 4.6                               | Enhanced stripe rust resistance in transgenic wheat                                      | (Huang et al., 2013)      |
| LOC_Os01g03340 | <i>BBTI4</i>      | Bowman-Birk type bran trypsin inhibitor              | 6.1                               | Conferred partial, broad-spectrum resistance against bacterial blight in transgenic rice | (Pang et al., 2013)       |

<sup>1)</sup> Fold change (FC) is represented as the average of the two independent transgenic lines 5 and 16 at seedling and adult plant stages.



**Table S4.** Comparison of the ‘*Lr34res*-responsive core gene set’ to a microarray study of seven-day-old rice seedlings incubated in solutions of 100  $\mu$ M abscisic acid (ABA), 100  $\mu$ M salicylic acid (SA), 100  $\mu$ M jasmonic acid (JA), 50  $\mu$ M benzyl aminopurine (BAP; cytokinin), 50  $\mu$ M indole-3-acetic-acid (IAA; auxin) or 100  $\mu$ M 1-aminocyclopropane-1-carboxylic acid (ACC; ethylene derivative) (Garg *et al.*, 2012). In total 4,171 hormone-responsive genes were identified. 80 (79 up-regulated and 1 down-regulated) of the 159 *Lr34res*-responsive core genes were present in this list of 4,171 hormone-responsive genes. The numbers in the table list the number of genes (out of 80) that were responsive to the respective hormone. A relative quality score was assigned as following: If a gene of the 80 *Lr34res*-responsive core genes was differentially expressed by the respective hormone in the hormone study with the same direction (up- or down-regulated) it was given the score +1. If a gene of the 80 *Lr34res*-responsive core genes was not differentially expressed in the hormone study or differentially expressed in the opposite direction it was given the score -1. The relative quality score was calculated as the sum of the individual ratings. A score of 80 indicates perfect correlation between the two data sets whereas a score of -80 indicates no correlation.

| up-regulated in <i>Lr34res</i> core gene set | 79 | down-regulated in <i>Lr34res</i> core gene set | 1 | relative quality score | exclusively regulated by respective hormone | also ABA regulated |
|----------------------------------------------|----|------------------------------------------------|---|------------------------|---------------------------------------------|--------------------|
| up-regulated by ABA                          | 68 | down-regulated by ABA                          | 0 | 56                     | 35                                          | -                  |
| up-regulated by SA                           | 26 | down-regulated by SA                           | 0 | -28                    | 2                                           | 23                 |
| up-regulated by JA                           | 19 | down-regulated by JA                           | 0 | -42                    | 1                                           | 14                 |
| up-regulated by BAP                          | 8  | down-regulated by BAP                          | 0 | -64                    | 2                                           | 6                  |
| up-regulated by IAA                          | 4  | down-regulated by IAA                          | 0 | -72                    | 0                                           | 3                  |
| up-regulated by ACC                          | 3  | down-regulated by ACC                          | 0 | -74                    | 0                                           | 3                  |

**Table S5.** Comparison of the '*Lr34res*-responsive core gene set' to an RNAseq analysis performed in *Brachypodium* seedlings incubated in 10  $\mu$ M abscisic acid (ABA), 100  $\mu$ M salicylic acid (SA), 30  $\mu$ M methyl jasmonate (MJ), 1  $\mu$ M cytokinin (CK) or 10  $\mu$ M indole-3-acetic acid (IAA; auxin) (Kakei *et al.*, 2015). DEG = differentially expressed genes. 'DEG with rice orthologs' lists the *Brachypodium* genes that had a clear ortholog in rice.

| Hormone    | DEG in <i>Brachypodium</i> | DEG with rice orthologs | Found in <i>Lr34res</i> core gene set | Expected*   | p-value           |
|------------|----------------------------|-------------------------|---------------------------------------|-------------|-------------------|
| <b>ABA</b> | <b>445</b>                 | <b>409</b>              | <b>25</b>                             | <b>3.35</b> | <b>&lt;0.0001</b> |
| MJ         | 383                        | 352                     | 5                                     | 2.89        | 0.21              |
| IAA        | 125                        | 118                     | 0                                     | 1           | 0.32              |
| SA         | 81                         | 75                      | 0                                     | 0.5         | 0.48              |
| CK         | 23                         | 22                      | 0                                     | 0           | -                 |

\* Number of genes expected to be found in the '*Lr34res*-responsive core gene set' if there were no enrichment for a particular hormone. The values were calculated based on the number of 'DEG with rice orthologs' and the total number of genes (19,399) identified in the hormone study (Kakei *et al.*, 2015). For example, 409 DEG for ABA represent 2.1% of the total genes. 2.1% of 159 *Lr34res*-responsive genes correspond to 3.35 genes that would be expected in the '*Lr34res*-responsive core gene set' by chance. The p-value was calculated based on the expected and observed genes using a Chi-square test.

**Table S6.** P-values of the generalized linear analysis based on the leaf sheath assay shown in Fig. 5c. P-values < 0.05 are marked in grey.

**Level-wise generalized linear model**

| Comparison                | p-value |         |         |         |
|---------------------------|---------|---------|---------|---------|
|                           | Level 1 | Level 2 | Level 3 | Level 4 |
| 19sib x 27-3 - 19 x wt    | 0.0005  | 0.9860  | 0.0015  | 0.0290  |
| 19 x 27-3 - 19 x wt       | < 0.001 | < 0.001 | < 0.001 | 0.42957 |
| 19sib x wt - 19 x wt      | < 0.001 | < 0.001 | < 0.001 | < 0.001 |
| 19 x 27-3 - 19sib x 27-3  | < 0.001 | < 0.001 | < 0.001 | 0.00294 |
| 19sib x wt - 19sib x 27-3 | < 0.001 | < 0.001 | < 0.001 | 0.23143 |
| 19sib x wt - 19 x 27-3    | < 0.001 | 0.6780  | < 0.001 | < 0.001 |

## References

- Claes B, Dekeyser R, Villarroel R, Vandenbulcke M, Bauw G, Vanmontagu M, Caplan A. 1990.** Characterization of a rice gene showing organ-specific expression in response to salt stress and drought. *Plant Cell* **2**(1): 19-27.
- Duan JZ, Zhang MH, Zhang HL, Xiong HY, Liu PL, Ali J, Li JJ, Li Z. 2012.** *OsMIOX*, a myo-inositol oxygenase gene, improves drought tolerance through scavenging of reactive oxygen species in rice (*Oryza sativa* L.). *Plant Science* **196**: 143-151.
- Frandsen G, MullerUri F, Nielsen M, Mundy J, Skriver K. 1996.** Novel plant Ca<sup>2+</sup>-binding protein expressed in response to abscisic acid and osmotic stress. *Journal of Biological Chemistry* **271**(1): 343-348.
- Garg R, Tyagi AK, Jain M. 2012.** Microarray analysis reveals overlapping and specific transcriptional responses to different plant hormones in rice. *Plant Signaling & Behavior* **7**(8): 951-956.
- Huang X, Wang J, Du Z, Zhang C, Li L, Xu ZQ. 2013.** Enhanced resistance to stripe rust disease in transgenic wheat expressing the rice chitinase gene *RC24*. *Transgenic Research* **22**(5): 939-947.
- Kakei Y, Mochida K, Sakurai T, Yoshida T, Shinozaki K, Shimada Y. 2015.** Transcriptome analysis of hormone-induced gene expression in *Brachypodium distachyon*. *Scientific Reports* **5**: 14476.
- Li L, Li N, Song SF, Li YX, Xia XJ, Fu XQ, Chen GH, Deng HF. 2014.** Cloning and characterization of the drought-resistance *OsRC12-5* gene in rice (*Oryza sativa* L.). *Genetics and Molecular Research* **13**(2): 4022-4035.
- Maruyama K, Urano K, Yoshiwara K, Morishita Y, Sakurai N, Suzuki H, Kojima M, Sakakibara H, Shibata D, Saito K, et al. 2014.** Integrated analysis of the effects of cold and dehydration on rice metabolites, phytohormones, and gene transcripts. *Plant Physiology* **164**(4): 1759-1771.
- Pang ZQ, Zhou ZZ, Yin DD, Lv QM, Wang LX, Xu X, Wang J, Li XB, Zhao XF, Jiang GH, et al. 2013.** Transgenic rice plants overexpressing BBT14 confer partial but broad-spectrum bacterial blight resistance. *Journal of Plant Biology* **56**(6): 383-390.
- Perez-Diaz J, Wu TM, Perez-Diaz R, Ruiz-Lara S, Hong CY, Casaretto JA. 2014.** Organ- and stress-specific expression of the *ASR* genes in rice. *Plant Cell Reports* **33**(1): 61-73.
- Risk JM, Selter LL, Chauhan H, Krattinger SG, Kumlehn J, Hensel G, Viccars LA, Richardson TM, Buesing G, Troller A, et al. 2013.** The wheat *Lr34* gene provides resistance against multiple fungal pathogens in barley. *Plant Biotechnology Journal* **11**(7): 847-854.
- Shaik R, Ramakrishna W. 2014.** Machine learning approaches distinguish multiple stress conditions using stress-responsive genes and identify candidate genes for broad resistance in rice. *Plant Physiology* **164**(1): 481-495.
- Wang MB, Boulter D, Gatehouse JA. 1992.** A complete sequence of the rice sucrose synthase-1 (*RSs1*) gene. *Plant Molecular Biology* **19**(5): 881-885.

- Xiao BZ, Huang YM, Tang N, Xiong LZ. 2007.** Over-expression of a *LEA* gene in rice improves drought resistance under the field conditions. *Theoretical and Applied Genetics* **115**(1): 35-46.
- Zheng J, Wang YY, He YA, Zhou JJ, Li YP, Liu QQ, Xie XZ. 2014.** Overexpression of an S-like ribonuclease gene, *OsRNS4*, confers enhanced tolerance to high salinity and hyposensitivity to phytochrome-mediated light signals in rice. *Plant Science* **214**: 99-105.
